# Supplementary material for: Luminescent porous metal–organic gels for efficient adsorption and sensitive detection of chlortetracycline hydrochloride assisted by smartphones and a test paper-based analytical device
Source: Royal Society of Chemistry journal article supplement (doi:10.1039/d1qi01669e), 2022-01-01
Supplement: d1qi01669e1.pdf [file d1qi01669e1.pdf]

Supporting information for

**Luminescent porous metal–organic gels for efficient adsorption and sensitive detection of chlortetracycline hydrochloride assisted by smartphones and test paper-based analytical device**

Meijun Liu <sup>a,1</sup>, Shuai Xia <sup>a,1</sup>, Zhi Liu <sup>b</sup>, Taigang Ma <sup>a</sup>, Zhisheng Liu <sup>b</sup>, Yangxue Li <sup>a, c, \*</sup>,  
Donglei Zou <sup>a, \*</sup>

<sup>a</sup> *Key Lab of Groundwater Resources and Environment (Ministry of Education), Jilin Provincial Key Laboratory of Water Resources and Environment, Jilin University, 2519 Jiefang Road, Changchun 130021, P. R. China*

<sup>b</sup> *School of Municipal and Environmental Engineering, Jilin Jianzhu University, 5088 Xincheng Street, Changchun 130118, P. R. China*

<sup>c</sup> *Chongqing Research Institute, Jilin University, Chongqing 401123, P. R. China*

## **Supporting Information contains:**

### **Experimental Section:**

1. The equations for calculating the quenching effect and *LOD*
2. The equation for calculating the CTC concentration from *R*, *G* and *B* values
3. The summary of utilized models in manuscript

### **Figures:**

**Fig. S1.** The SEM and TEM results of JLUE-MOG-9 and JLUE-MOG-11.

**Fig. S2.** The XRD patterns of the JLUE-MOGs.

**Fig. S3.** The TGA curves of JLUE-MOG-9 and JLUE-MOG-11.

**Fig. S4.** The BET results and the pore size distributions of JLUE-MOG-9 and JLUE-MOG-11.

**Fig. S5.** The XPS spectra of JLUE-MOG-9.

**Fig. S6.** The XPS spectra of JLUE-MOG-10.

**Fig. S7.** The XPS spectra of JLUE-MOG-11.

**Fig. S8.** Adsorptive removal and corresponding pseudo-first-order kinetic model, pseudo-second-order kinetic model and intra-particle diffusion model fittings for the CTC adsorption by JLUE-MOG-9.

**Fig. S9.** Pseudo-first-order kinetic model, pseudo-second-order kinetic model and intra-particle diffusion model fittings for the CTC adsorption by JLUE-MOG-10.

**Fig. S10.** Adsorptive removal and corresponding pseudo-first-order kinetic model, pseudo-second-order kinetic model and intra-particle diffusion model fittings for the CTC adsorption by JLUE-MOG-11.

**Fig. S11.** The Freundlich, Langmuir and Temkin linear fittings for CTC adsorption removal by the JLUE-MOGs at 25 °C.

**Fig. S12.** Variance in CTC removal efficiencies and adsorption capacities per unit weight adsorbents of JLUE-MOG-9 and JLUE-MOG-11 as a function of adsorbent dosage.

**Fig. S13.** The XRD spectra of JLUE-MOG-10 and regenerated JLUE-MOG-10.

**Fig. S14.** The contact angles of JLUE-MOGs in distilled water.

**Fig. S15.** The XPS spectra of CTC@JLUE-MOG-10.

**Fig. S16.** The actual results plotted against the predicted responses derived from the FCCD model of CTC removal.

**Fig. S17.** 3D surface plots and corresponding contour plots for interactions between initial pH, initial CTC concentration and JLUE-MOG dosage.

**Fig. S18.** The excitation spectrum of JLUE-MOG-9, the emission spectra of TATB, and the UV-Vis absorption spectra of TATB and CTC.

**Fig. S19.** The plot between *CR* values and various CTC concentrations, insert: the digital photos of fluorescence of JLUE-MOG-9 under 254 nm UV light.

**Fig. S20.** The SEM results of blank paper and JLUE-MOG-9@paper.

**Fig. S21.** The XPS spectra of JLUE-MOG-9@paper.

**Fig. S22.** The XPS spectra of blank paper.

**Fig. S23.** The XRD spectra of JLUE-MOG-9 and JLUE-MOG-9@paper.

**Fig. S24.** The relationships between the values of green channel of JLUE-MOG-9@paper and various CTC concentrations in distilled water, tap water and river water.

**Tables:**

**Table S1.** Pseudo-first-order kinetic model parameters for CTC adsorption by JLUE-MOG-9, JLUE-MOG-10 and JLUE-MOG-11.

**Table S2.** Pseudo-second-order kinetic model parameters for CTC adsorption by JLUE-MOG-9, JLUE-MOG-10 and JLUE-MOG-11.

**Table S3.** Intra-particle diffusion model parameters for CTC adsorption by JLUE-MOG-9, JLUE-MOG-10 and JLUE-MOG-11.

**Table S4.** Freundlich, Langmuir and Temkin adsorption isotherm model parameters for CTC adsorption by JLUE-MOG-9, JLUE-MOG-10 and JLUE-MOG-11.

**Table S5.** The water quality parameters of distilled water, tap water and river water.

**Table S6.** Cost estimation for the production of typical JLUE-MOG-10 per unit weight.

**Table S7.** FCCD experimental design and related CTC removal efficiencies by JLUE-MOG-10.

**Table S8.** ANOVA for the optimized FCCD model.

**Table S9.** FCCD design validation at optimized conditions.

**Table S10.** Comparison of CTC detection limit by various sensors.

**Table S11.** The recoveries of CTC in distilled water by the measurements of JLUE-MOG-9 based on a smartphone.

**Table S12.** The recoveries of CTC in distilled water, tap water and river water by the measurements of JLUE-MOG-9@paper based on a smartphone.

## Experimental Section:

*The equations for calculating the quenching effect and LOD :*

$$\frac{I_0}{I} = 1 + K_{SV} \times [C] \quad (1)$$

$$LOD = 3\sigma / K_{SV} \quad (2)$$

Where  $I_0$  and  $I$  are on behalf of the fluorescent intensities of JLUE-MOG-9 in the absence and existence of CTC with various concentrations, respectively;  $K_{SV}$  denotes the Stern–Volmer quenching constant;  $C$  is the CTC concentration in solution;  $LOD$  represents the detection limit, and  $\sigma$  is the standard derivation of the blank sample (10 times).

*The equation for calculating the CTC concentration from R, G and B values :*

$$CR = \frac{\left(\frac{R_s}{R_r} + \frac{G_s}{G_r} + \frac{B_s}{B_r}\right)}{3} \quad (3)$$

Where the  $R_s$ ,  $G_s$  and  $B_s$  represented the  $R$ ,  $G$  and  $B$  values of samples;  $R_r$ ,  $G_r$  and  $B_r$  were on behalf of the  $R$ ,  $G$  and  $B$  values of blank solution.

*The summary of utilized models in manuscript :*

| Adsorption kinetic models      | Equations                                             |
|--------------------------------|-------------------------------------------------------|
| Pseudo-first kinetic model     | $\ln(q_e - q_t) = \ln q_e - k_1 t$                    |
| Pseudo-second kinetic model    | $\frac{t}{q_t} = \frac{1}{k_2 q_e^2} + \frac{t}{q_e}$ |
| Intra-particle diffusion model | $q_t = k_i t^{1/2} + C$                               |

Where  $q_e$  and  $q_t$  are on behalf of the adsorbed amounts of CTC at equilibrium stage and time  $t$  ( $\text{mg} \cdot \text{g}^{-1}$ ), respectively;  $k_1$ ,  $k_2$  and  $k_i$  denote the pseudo-first-order kinetic model rate constant ( $\text{h}^{-1}$ ), the pseudo-second-order kinetic model rate constant ( $\text{g} \cdot \text{mg}^{-1} \cdot \text{h}^{-1}$ ) and the intra-particle diffusion model rate constant ( $\text{mg} \cdot \text{g}^{-1} \cdot \text{h}^{-1/2}$ ), respectively;  $C$  is the intercept ( $\text{mg} \cdot \text{g}^{-1}$ ).

| Adsorption Isotherm models | Equations                                               |
|----------------------------|---------------------------------------------------------|
| Freundlich                 | $\ln q_e = \ln K_F + \frac{1}{n} \ln C_e$               |
| Langmuir                   | $\frac{C_e}{q_e} = \frac{1}{K_L} + \frac{a_L C_e}{K_L}$ |
| Temkin                     | $q_e = B \ln K_T + B \ln C_e$                           |

Where  $q_e$  represents the same meaning as above;  $C_e$  is the equilibrium concentration of CTC in solution ( $\text{mg}\cdot\text{L}^{-1}$ );  $K_L$  and  $a_L$  are the Langmuir isotherm constants;  $K_F$  is the Freundlich isotherm constant;  $K_T$  is the Temkin constant ( $\text{L}\cdot\text{mg}^{-1}$ );  $B$  is related to the heat of adsorption ( $\text{J}\cdot\text{mol}^{-1}$ );  $1/n$  is a heterogeneity factor.

## Figures

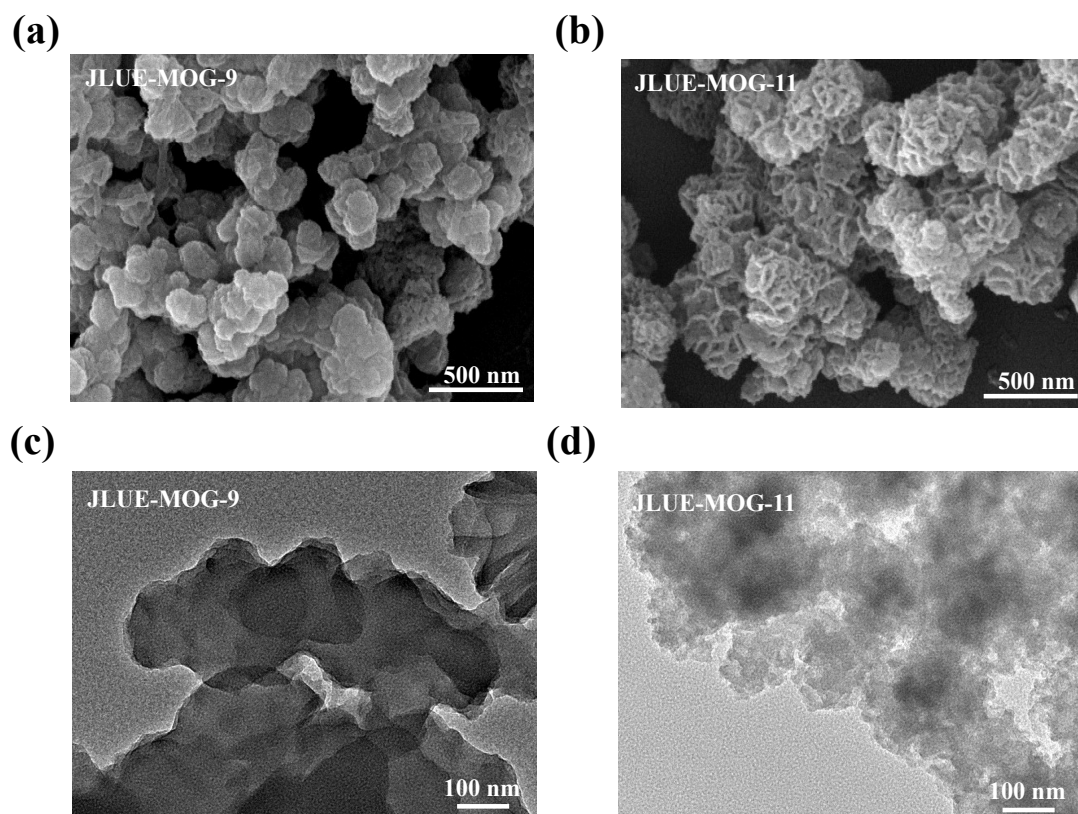

**Fig. S1.** The SEM results of (a) JLUE-MOG-9 and (b) JLUE-MOG-11. The TEM results of (c) JLUE-MOG-9 and (d) JLUE-MOG-11.

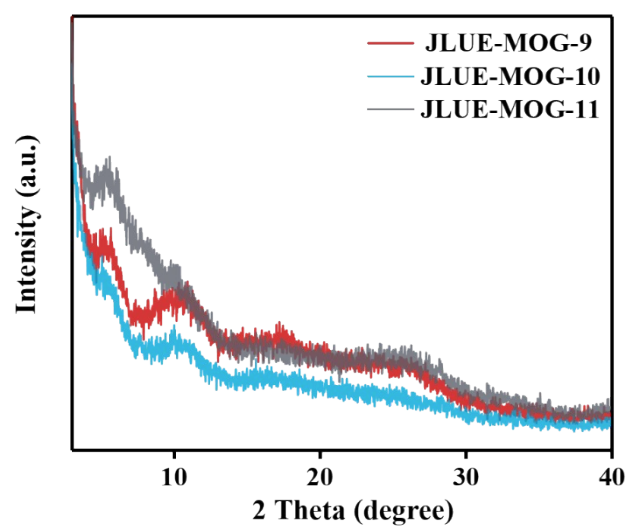

**Fig. S2.** The XRD patterns of the JLUE-MOGs.



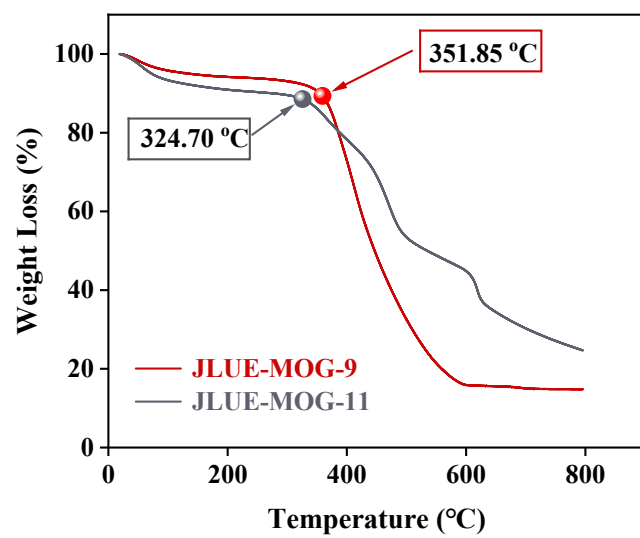

**Fig. S3.** The TGA curves of JLUE-MOG-9 and JLUE-MOG-11.

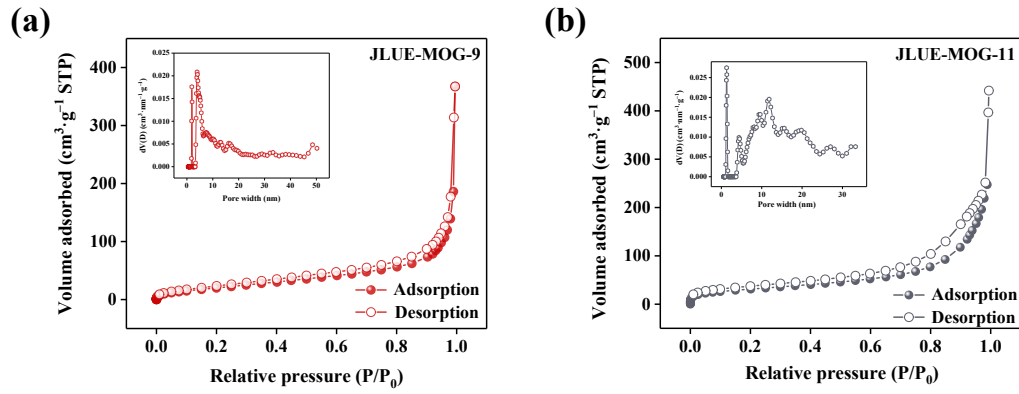

**Fig. S4.** The BET results of (a) JLUE-MOG-9 and (b) JLUE-MOG-11, insert: the pore size distributions of (a) JLUE-MOG-9 and (b) JLUE-MOG-11.

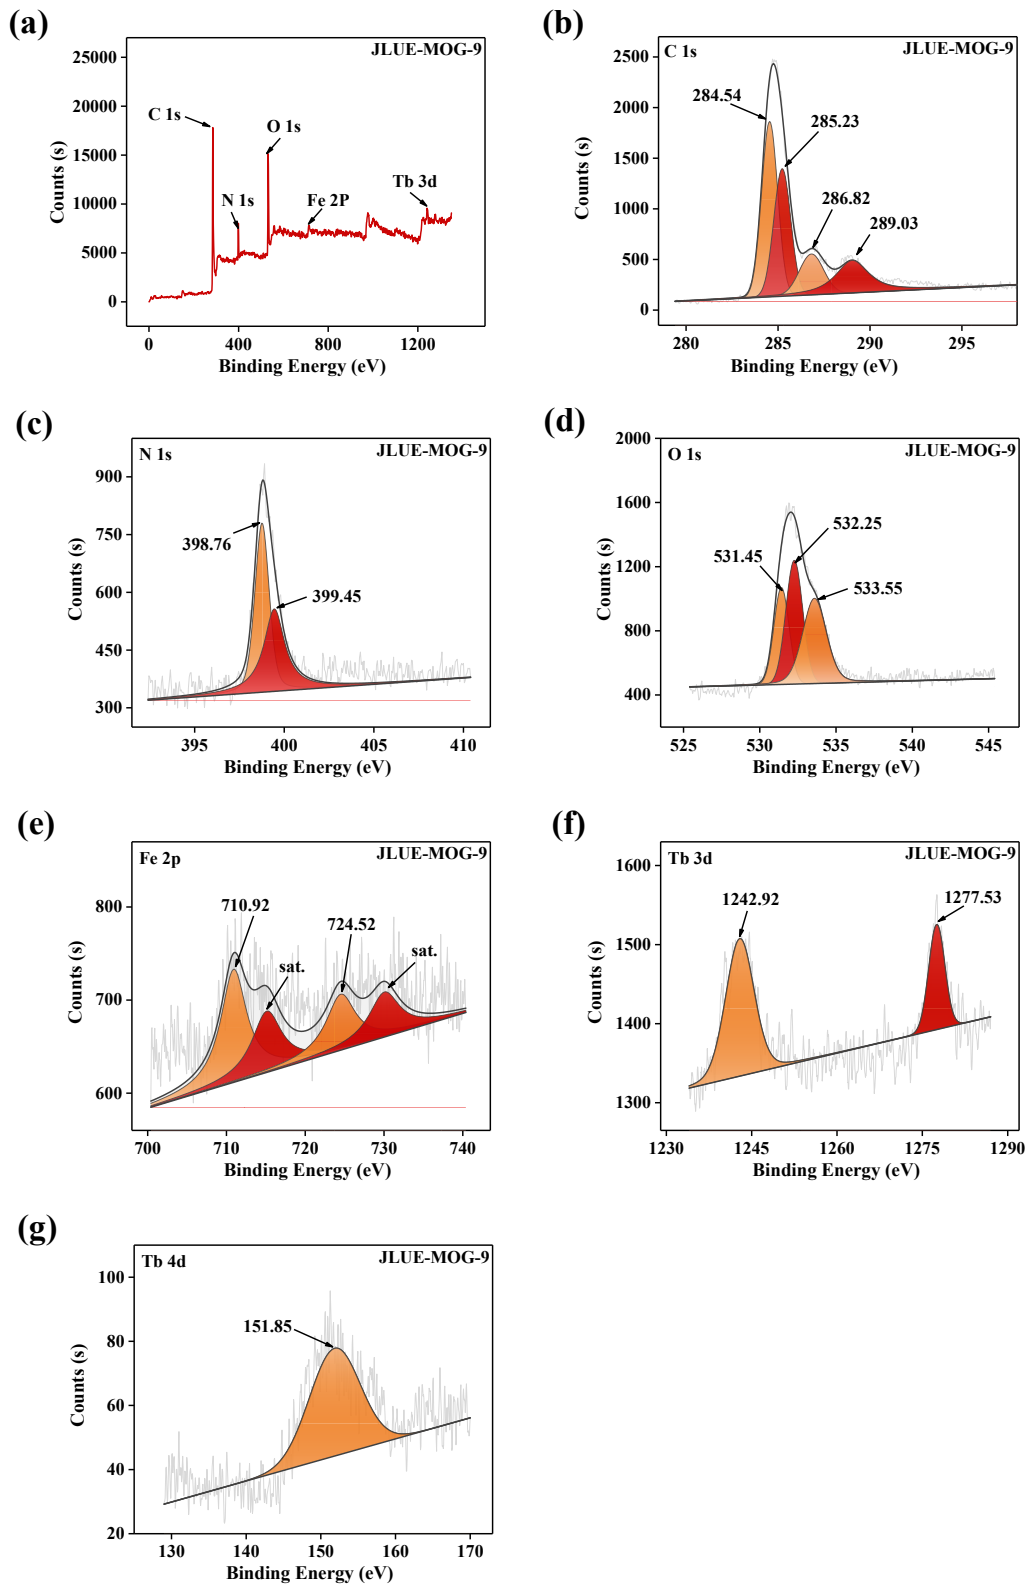

**Fig. S5.** The XPS spectra of JLUE-MOG-9: (a) Survey spectrum. (b) High-resolution spectrum of C 1s. (c) High-resolution spectrum of N 1s. (d) High-resolution spectrum of O 1s. (e) High-resolution spectrum of Fe 2p. (f) High-resolution spectrum of Tb 3d. (g) High-resolution spectrum of Tb 4d.

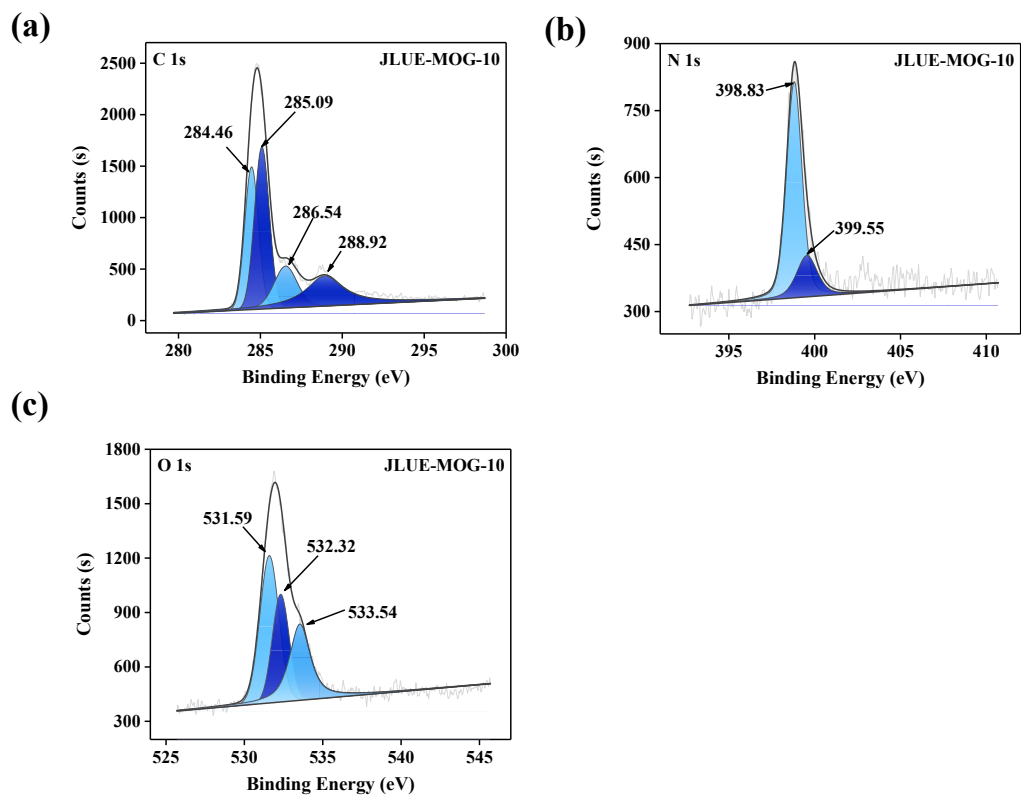

**Fig. S6.** The XPS spectra of JLUE-MOG-10: (a) High-resolution spectrum of C 1s. (b) High-resolution spectrum of N 1s. (c) High-resolution spectrum of O 1s.

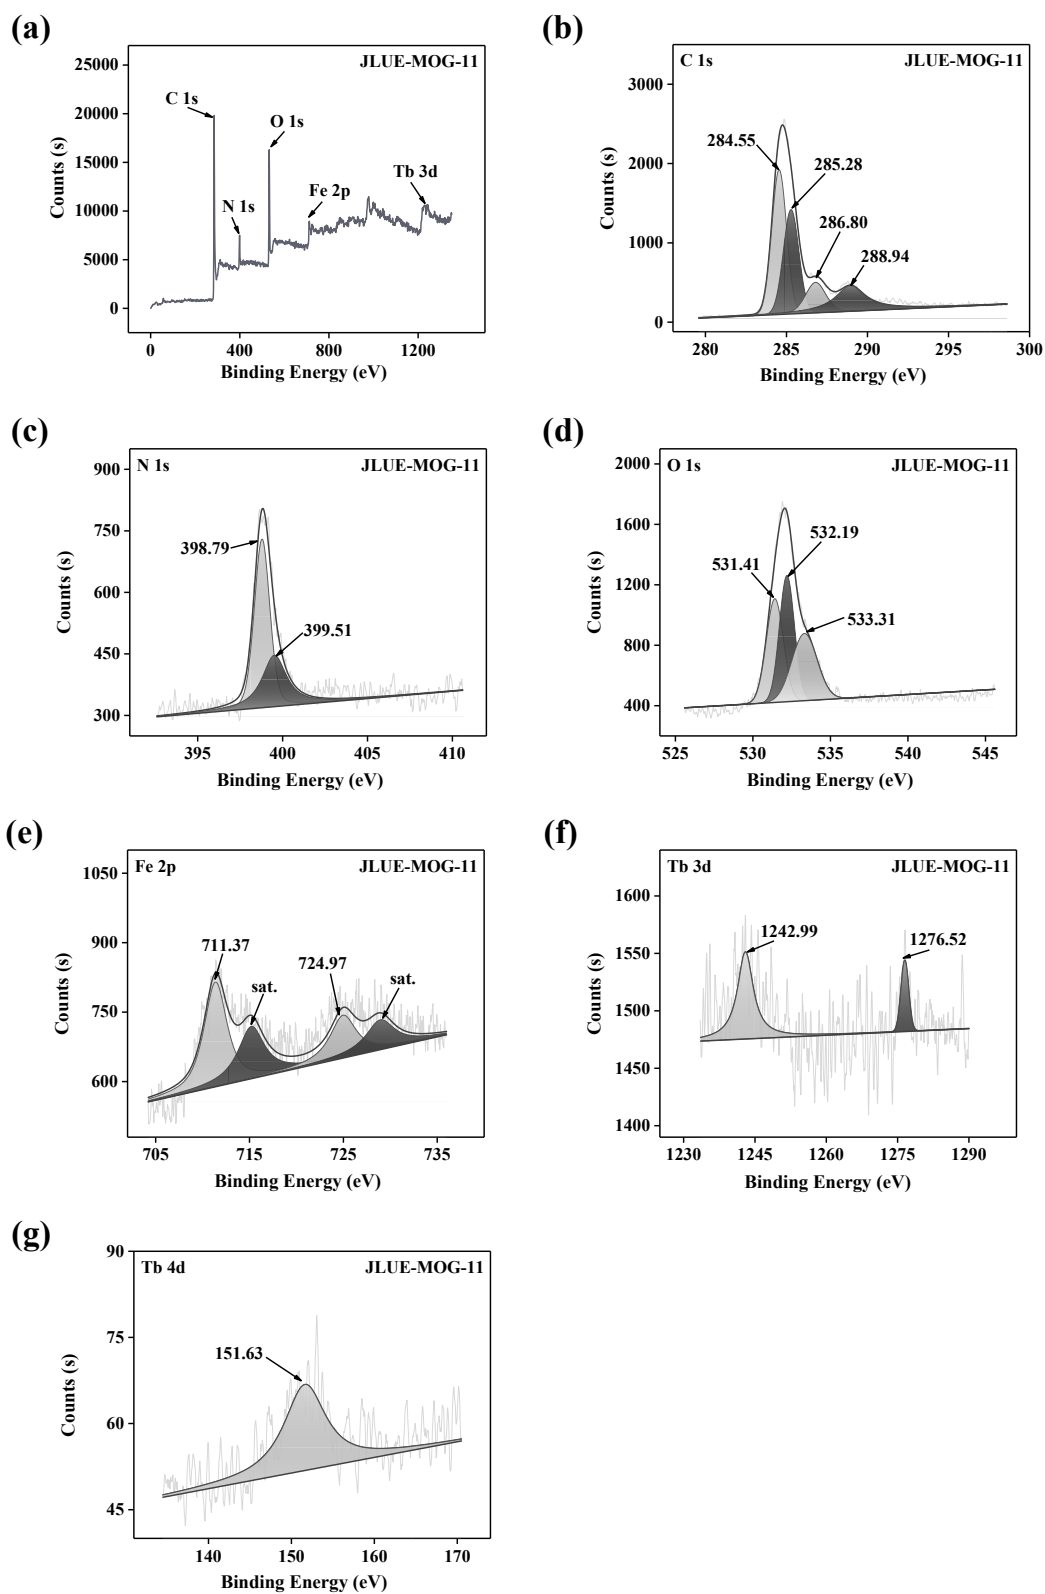

**Fig. S7.** The XPS spectra of JLUE-MOG-11: (a) Survey spectrum. (b) High-resolution spectrum of C 1s. (c) High-resolution spectrum of N 1s. (d) High-resolution spectrum of O 1s. (e) High-resolution spectrum of Fe 2p. (f) High-resolution spectrum of Tb 3d. (g) High-resolution spectrum of Tb 4d.

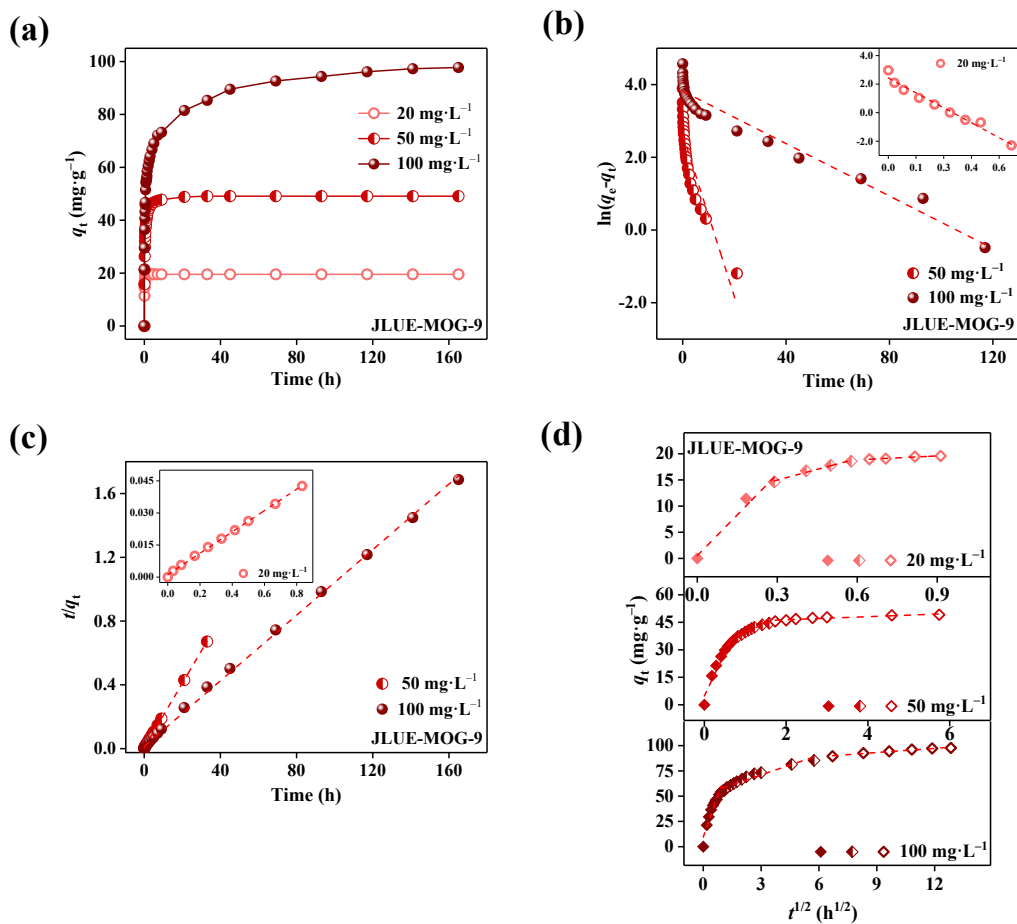

**Fig. S8.** (a) Adsorptive removal and (b) corresponding pseudo-first-order kinetic model, (c) pseudo-second-order kinetic model and (d) intra-particle diffusion model fittings for the CTC adsorption by JLUE-MOG-9.

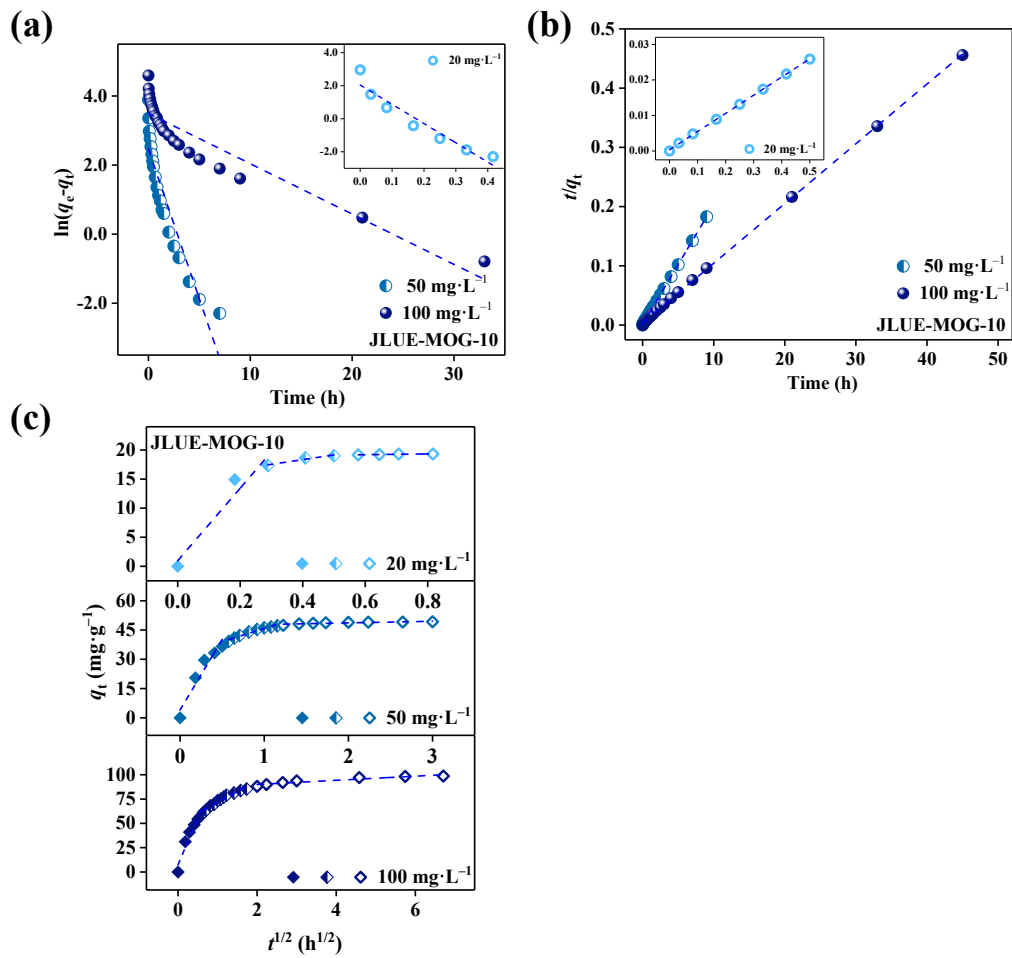

**Fig. S9.** (a) Pseudo-first-order kinetic model, (b) pseudo-second-order kinetic model and (c) intra-particle diffusion model fittings for the CTC adsorption by JLUE-MOG-10.

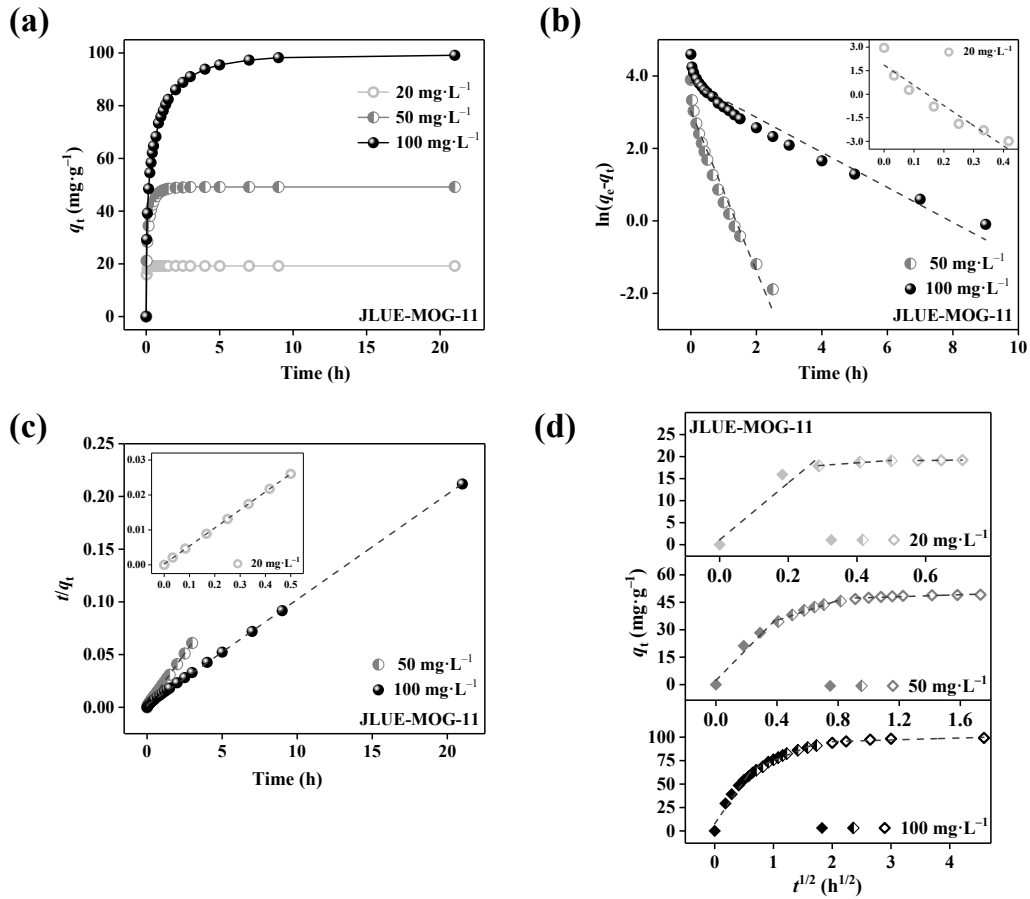

**Fig. S10.** (a) Adsorptive removal and (b) corresponding pseudo-first-order kinetic model, (c) pseudo-second-order kinetic model and (d) intra-particle diffusion model fittings for the CTC adsorption by JLUE-MOG-11.



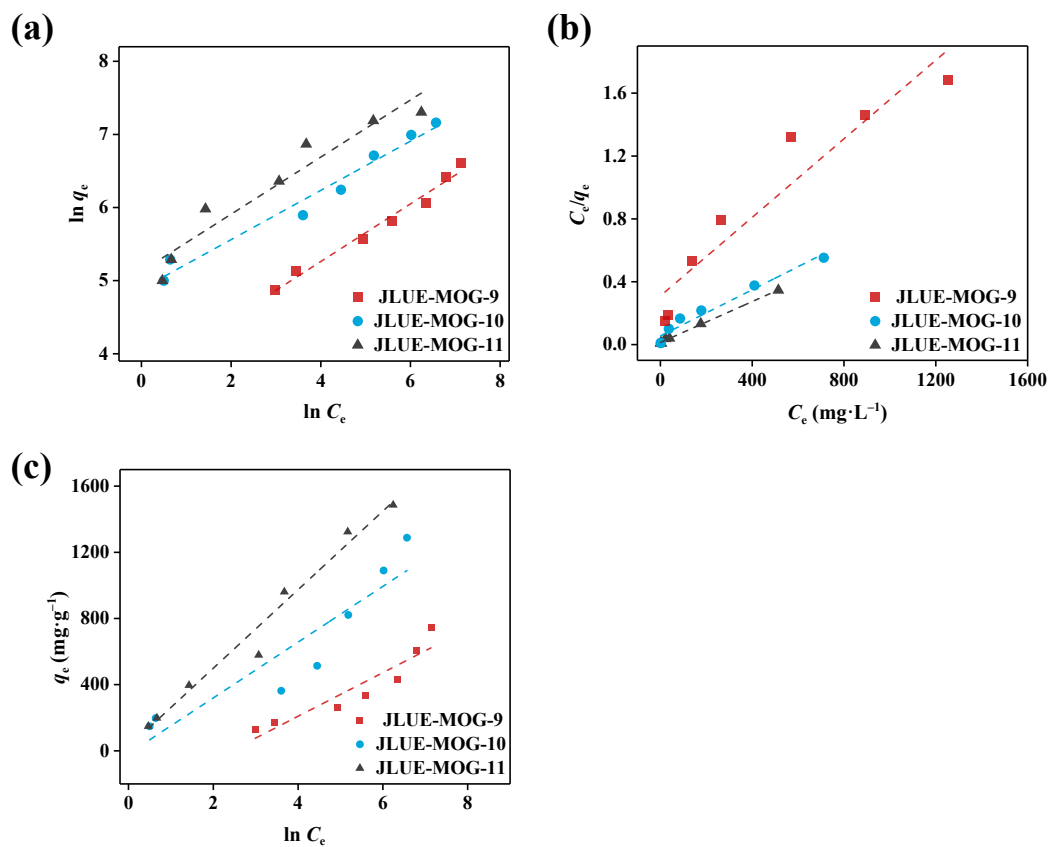

**Fig. S11.** (a) The Langmuir , (b) Freundlich and (c) Temkin linear fittings for CTC adsorptive removal by the JLUE-MOGs at 25 °C.

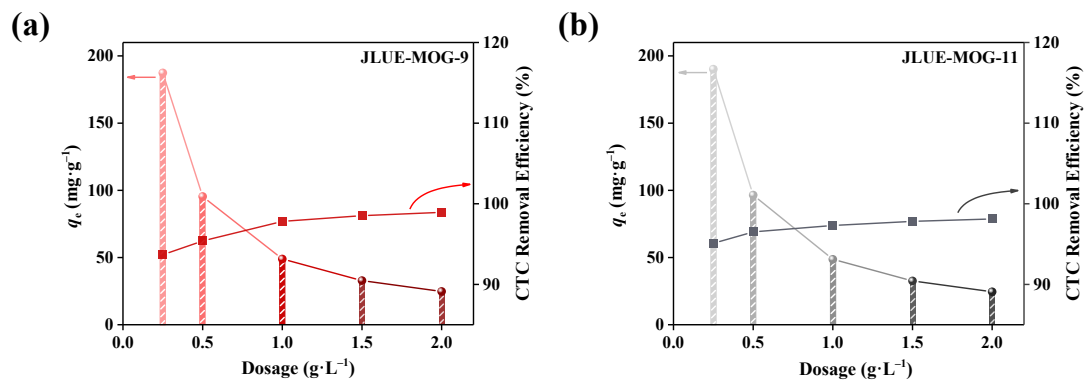

**Fig. S12.** Variance in CTC removal efficiencies and adsorption capacities per unit weight adsorbents ( $q_e$ ) of (a) JLUE-MOG-9 and (b) JLUE-MOG-11 as a function of adsorbent dosage.

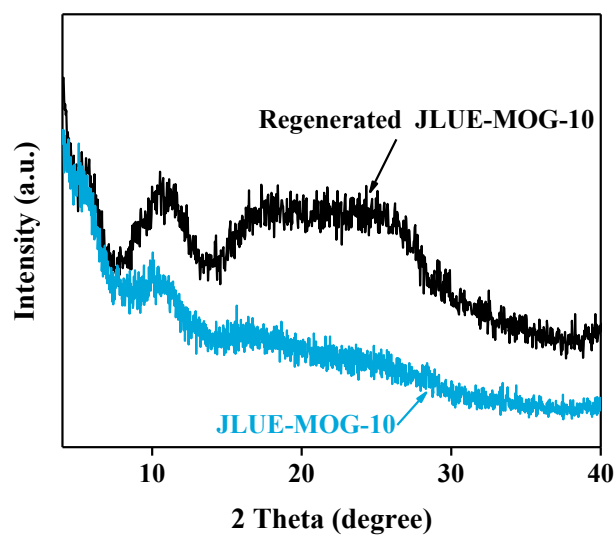

**Fig. S13.** The XRD spectra of JLUE-MOG-10 and regenerated JLUE-MOG-10.

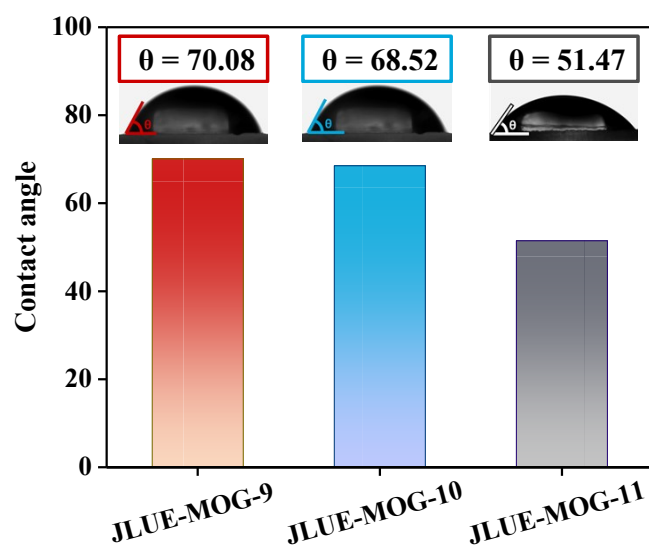

**Fig. S14.** The contact angles of JLUE-MOGs in distilled water.

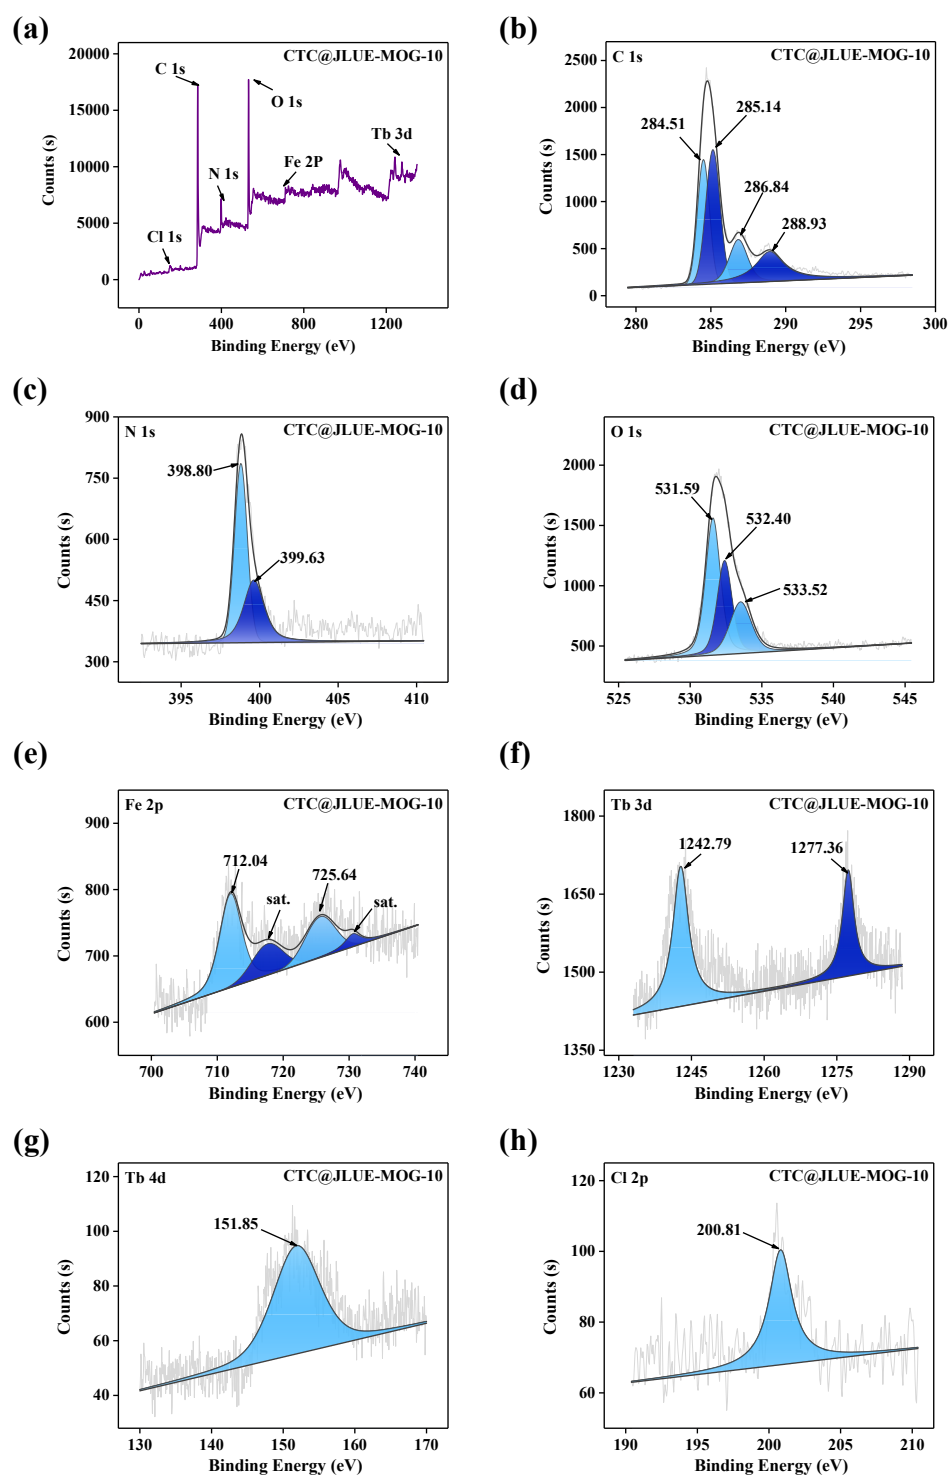

**Fig. S15.** The XPS spectra of CTC@JLUE-MOG-10: (a) Survey spectrum. (b) High-resolution spectrum of C 1s. (c) High-resolution spectrum of N 1s. (d) High-resolution spectrum of O 1s. (e) High-resolution spectrum of Fe 2p. (f) High-resolution spectrum of Tb 3d. (g) High-resolution spectrum of Tb 4d. (h) High-resolution spectrum of Cl 2p.

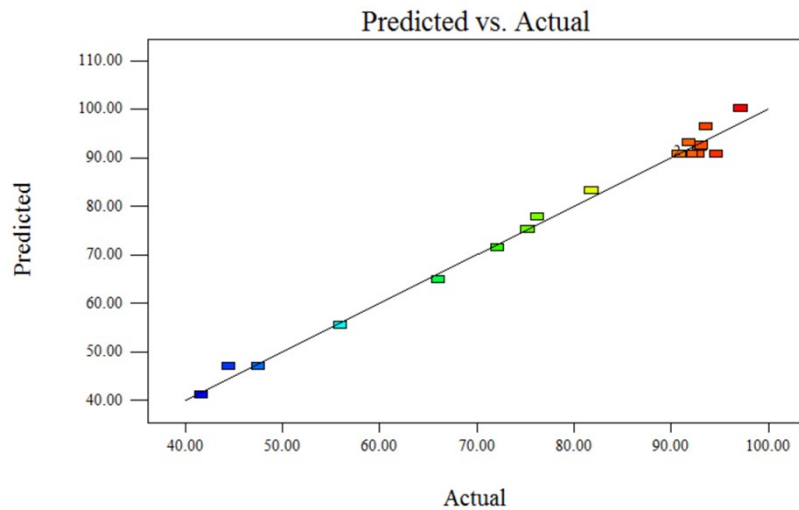

**Fig. S16.** The actual results plotted against the predicted responses derived from the FCCD model of CTC removal.

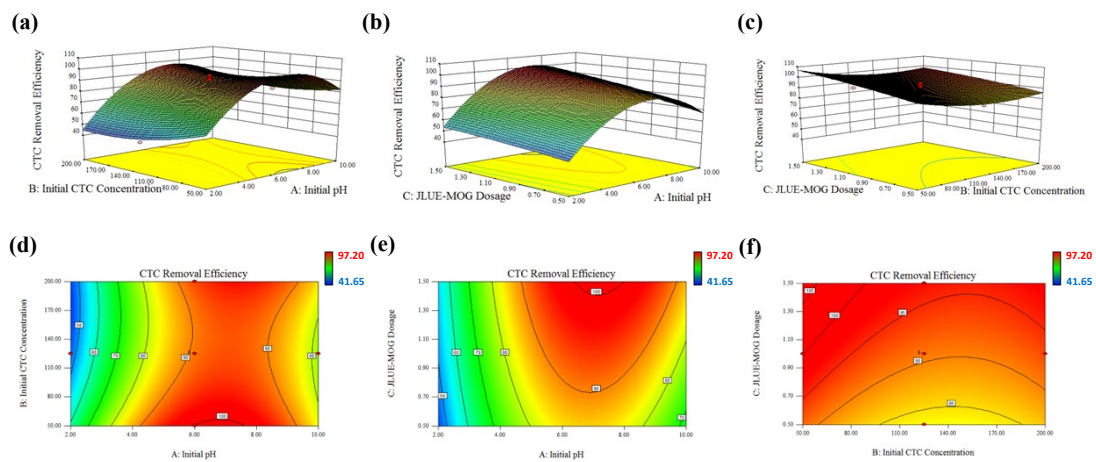

**Fig. S17.** 3D surface plots and corresponding contour plots for interactions between initial pH and initial CTC concentration (a, d), initial pH and JLUE-MOG dosage (b, e) and initial CTC concentration and JLUE-MOG dosage (c, f).

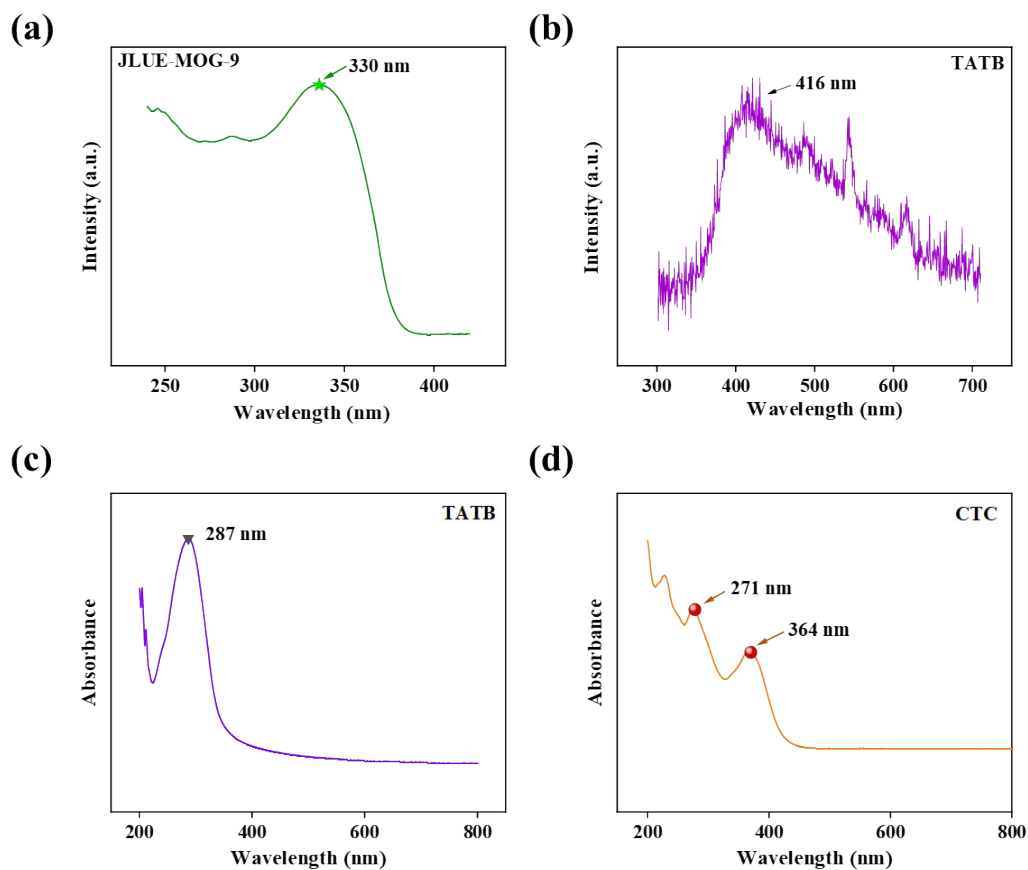

**Fig. S18.** (a) The excitation spectrum of JLUE-MOG-9. (b) The emission spectrum of TATB. (c) The UV-Vis absorption spectrum of TATB. (d) The UV-Vis absorption spectrum of CTC.



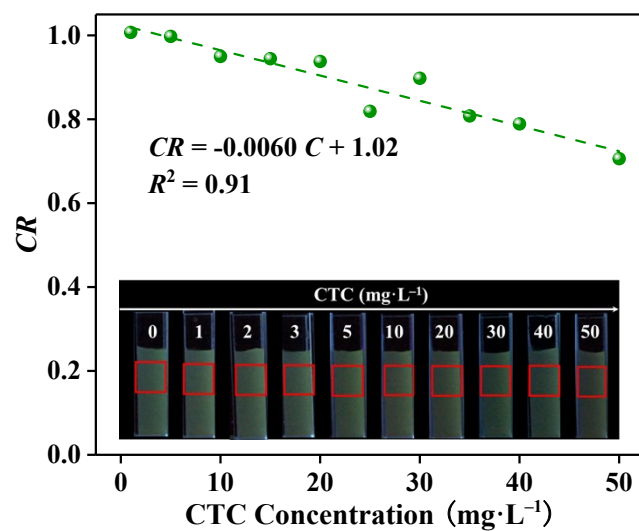

**Fig. S19.** The plot between  $CR$  values and various CTC concentrations, insert: the digital photos of fluorescence of JLUE-MOG-9 under 254 nm UV light.

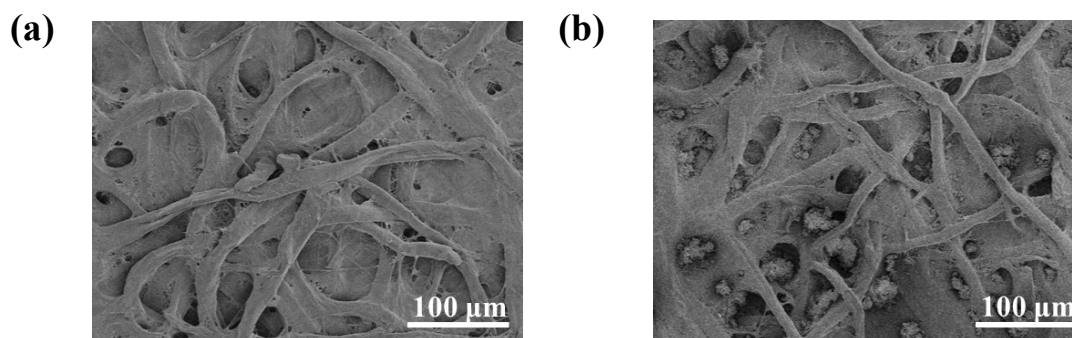

**Fig. S20.** The SEM results of (a) blank paper and (b) JLUE-MOG-9@paper.

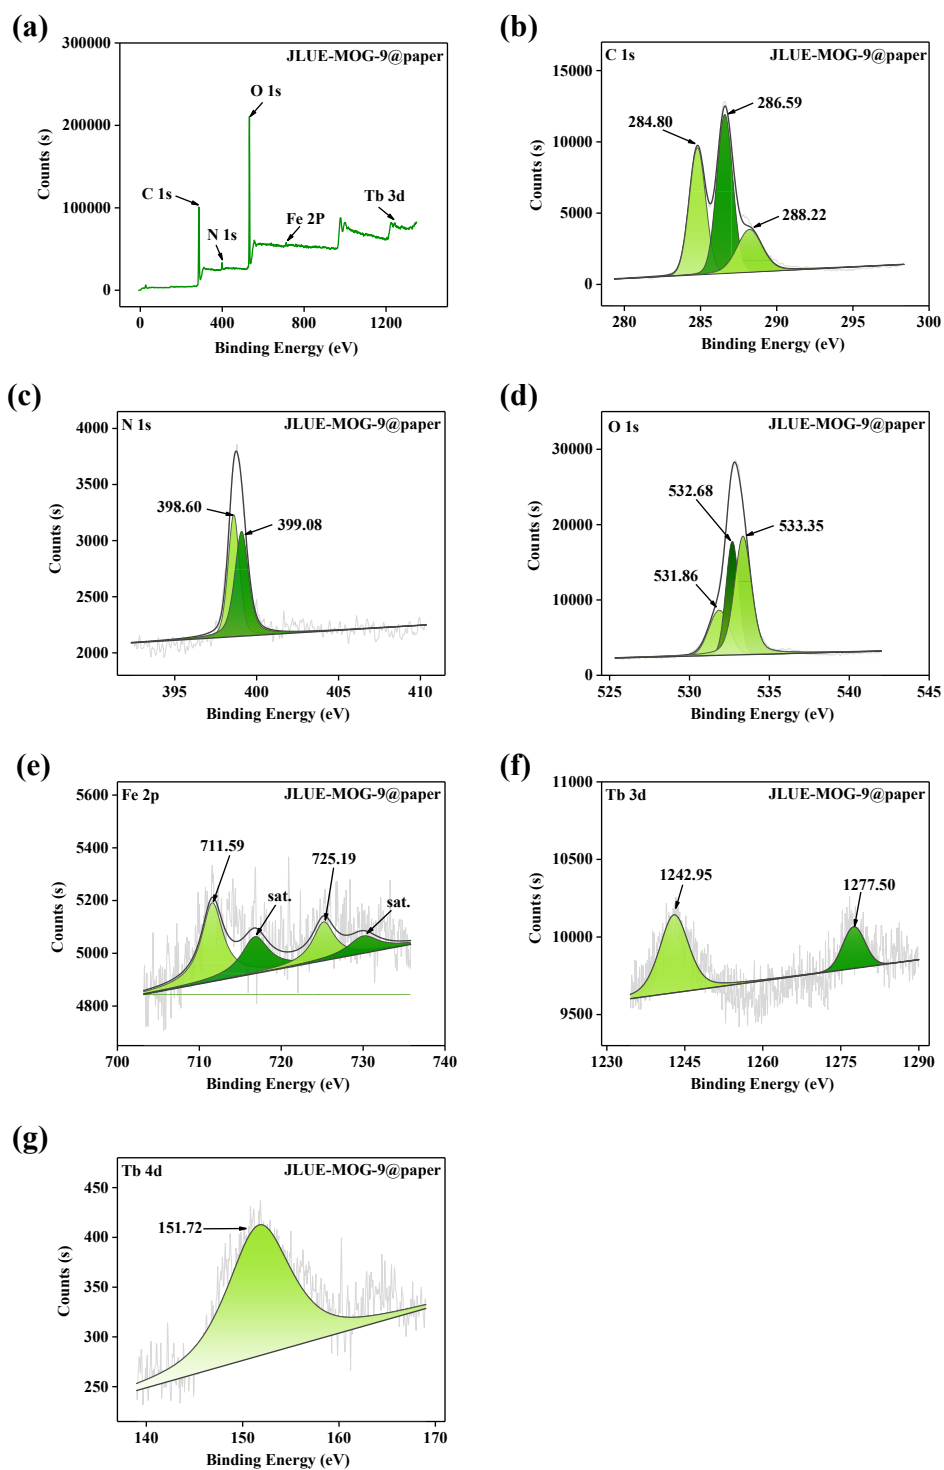

**Fig. S21.** The XPS spectra of JLUE-MOG-9@paper: (a) The survey spectrum. (b) High-resolution spectrum of C 1s. (c) High-resolution spectrum of N 1s. (d) High-resolution spectrum of O 1s. (e) High-resolution spectrum of Fe 2p. (f) High-resolution spectrum of Tb 3d. (g) High-resolution spectrum of Tb 4d.

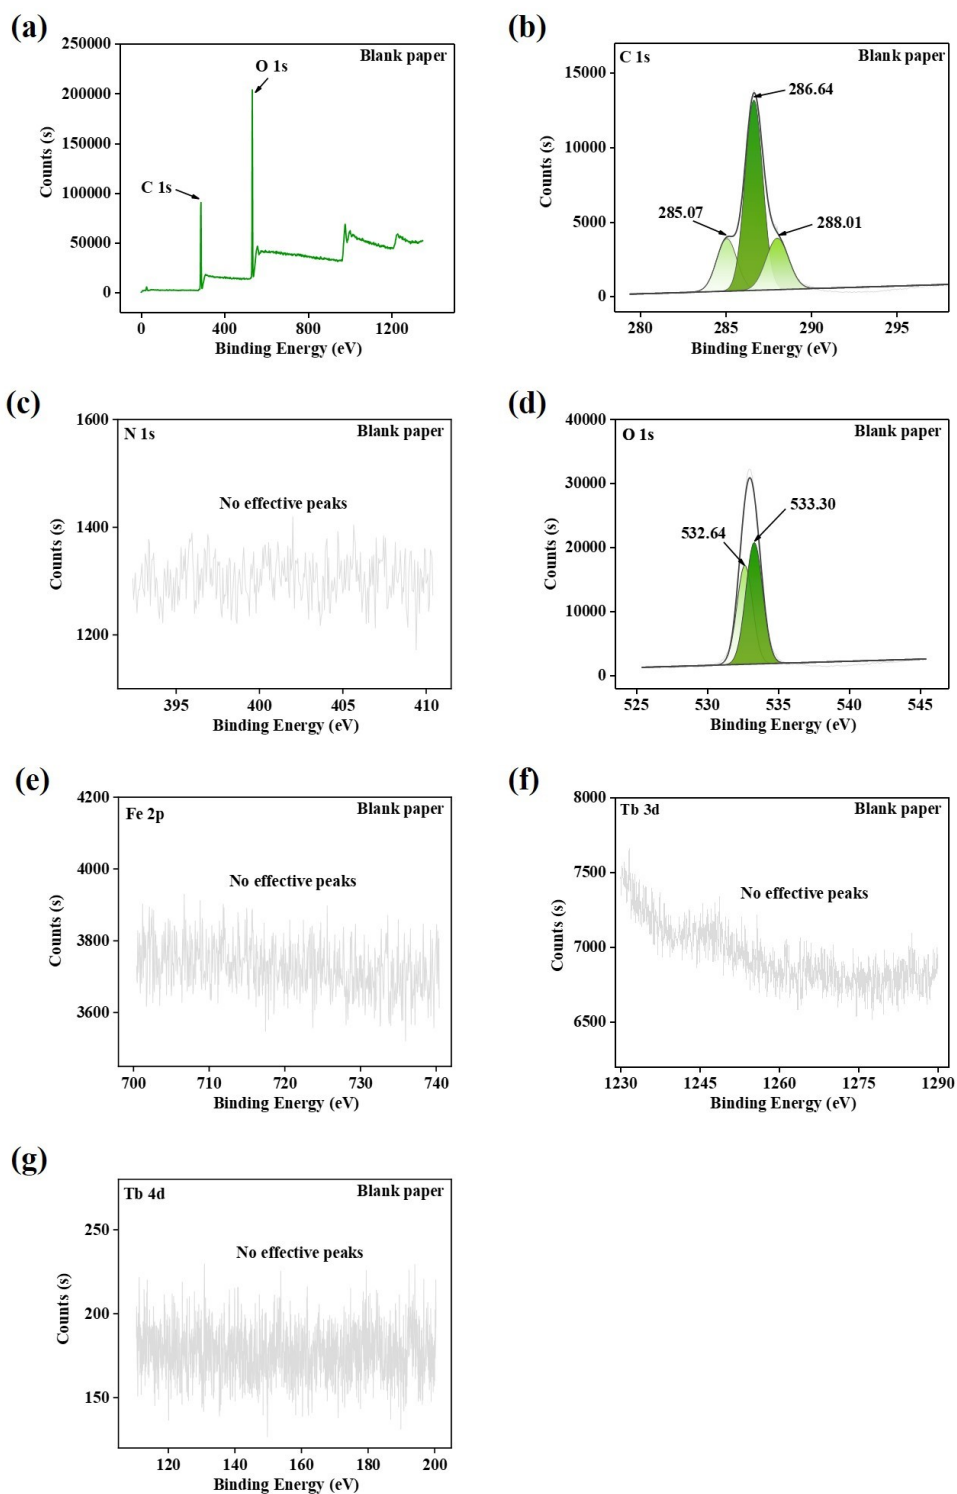

**Fig. S22.** The XPS spectra of blank paper: (a) The survey spectrum. (b) High-resolution spectrum of C 1s. (c) High-resolution spectrum of N 1s. (d) High-resolution spectrum of O 1s. (e) High-resolution spectrum of Fe 2p. (f) High-resolution spectrum of Tb 3d. (g) High-resolution spectrum of Tb 4d.

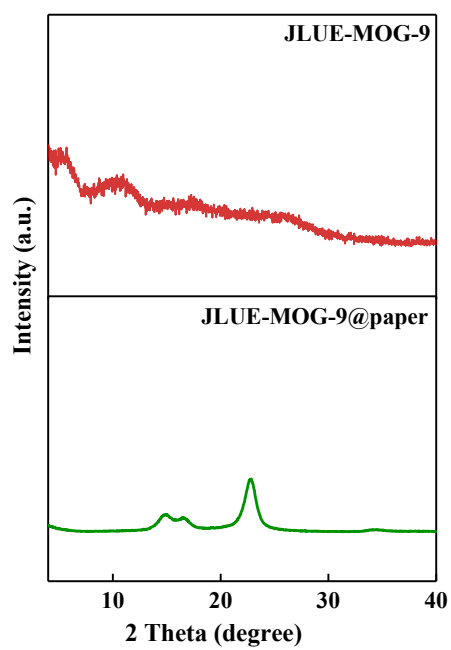

**Fig. S23.** The XRD spectra of JLUE-MOG-9 and JLUE-MOG-9@paper.

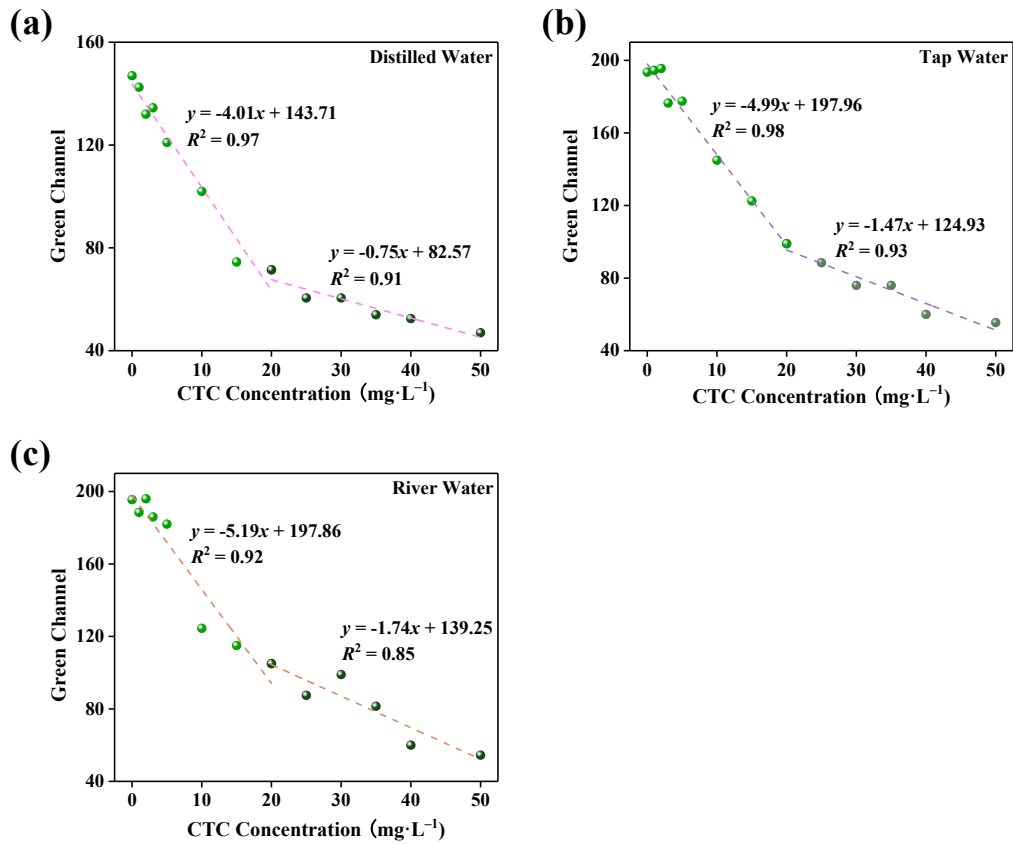

**Fig. S24.** The relationships between the values of green channel of JLUE-MOG-9@paper and various CTC concentrations in (a) distilled water, (b) tap water and (c) river water.

## Tables

**Table S1.** Pseudo-first-order kinetic model parameters for CTC adsorption by JLUE-MOG-9, JLUE-MOG-10 and JLUE-MOG-11.

| JLUE-MOGs   | $C_0$<br>( $\text{mg}\cdot\text{L}^{-1}$ ) | $q_{e,\text{exp}}$<br>( $\text{mg}\cdot\text{g}^{-1}$ ) | Removal<br>Efficiency ( % ) | Pseudo-first-order kinetics  |                                                            |                       |       |
|-------------|--------------------------------------------|---------------------------------------------------------|-----------------------------|------------------------------|------------------------------------------------------------|-----------------------|-------|
|             |                                            |                                                         |                             | $k_1$<br>( $\text{h}^{-1}$ ) | $q_{e1,\text{theor}}$<br>( $\text{mg}\cdot\text{g}^{-1}$ ) | $\Delta q_1$<br>( % ) | $R^2$ |
| JLUE-MOG-9  | 20                                         | 19.57                                                   | 97.32                       | 6.98                         | 11.42                                                      | 71.39                 | 0.97  |
|             | 50                                         | 49.11                                                   | 98.22                       | 0.22                         | 14.00                                                      | 250.68                | 0.78  |
|             | 100                                        | 97.75                                                   | 97.75                       | 0.04                         | 45.54                                                      | 114.63                | 0.94  |
| JLUE-MOG-10 | 20                                         | 19.31                                                   | 96.82                       | 11.66                        | 7.70                                                       | 150.74                | 0.92  |
|             | 50                                         | 49.21                                                   | 98.42                       | 0.87                         | 11.79                                                      | 317.46                | 0.86  |
|             | 100                                        | 98.91                                                   | 98.71                       | 0.15                         | 32.96                                                      | 200.12                | 0.86  |
| JLUE-MOG-11 | 20                                         | 19.21                                                   | 95.30                       | 12.86                        | 6.38                                                       | 201.26                | 0.91  |
|             | 50                                         | 49.16                                                   | 98.32                       | 2.20                         | 20.66                                                      | 137.90                | 0.95  |
|             | 100                                        | 99.11                                                   | 99.11                       | 0.48                         | 45.65                                                      | 117.12                | 0.94  |

**Table S2.** Pseudo-second-order kinetic model parameters for CTC adsorption by JLUE-MOG-9, JLUE-MOG-10 and JLUE-MOG-11.

| JLUE-MOGs   | $C_0$<br>( $\text{mg}\cdot\text{L}^{-1}$ ) | $q_{e,\text{exp}}$<br>( $\text{mg}\cdot\text{g}^{-1}$ ) | Removal<br>Efficiency<br>(%) | Pseudo-second-order kinetics                                 |                                                            |                     |       |
|-------------|--------------------------------------------|---------------------------------------------------------|------------------------------|--------------------------------------------------------------|------------------------------------------------------------|---------------------|-------|
|             |                                            |                                                         |                              | $k_2$<br>( $\text{g}\cdot\text{mg}^{-1}\cdot\text{h}^{-1}$ ) | $q_{e2,\text{theor}}$<br>( $\text{mg}\cdot\text{g}^{-1}$ ) | $\Delta q_2$<br>(%) | $R^2$ |
| JLUE-MOG-9  | 20                                         | 19.57                                                   | 97.32                        | 2.45                                                         | 20.02                                                      | 2.27                | 0.99  |
|             | 50                                         | 49.11                                                   | 98.22                        | 0.10                                                         | 49.31                                                      | 0.40                | 0.99  |
|             | 100                                        | 97.75                                                   | 97.75                        | 0.01                                                         | 97.28                                                      | 0.49                | 0.99  |
| JLUE-MOG-10 | 20                                         | 19.31                                                   | 96.82                        | 7.45                                                         | 19.54                                                      | 1.15                | 0.99  |
|             | 50                                         | 49.21                                                   | 98.42                        | 0.29                                                         | 49.63                                                      | 0.84                | 0.99  |
|             | 100                                        | 98.91                                                   | 98.71                        | 0.03                                                         | 99.11                                                      | 0.20                | 0.99  |
| JLUE-MOG-11 | 20                                         | 19.21                                                   | 95.30                        | 11.25                                                        | 19.37                                                      | 0.82                | 0.99  |
|             | 50                                         | 49.16                                                   | 98.32                        | 0.34                                                         | 50.18                                                      | 2.02                | 0.99  |
|             | 100                                        | 99.11                                                   | 99.11                        | 0.04                                                         | 100.20                                                     | 1.09                | 0.99  |



**Table S3.** Intra-particle diffusion model parameters for CTC adsorption by JLUE-MOG-9, JLUE-MOG-10 and JLUE-MOG-11.

| Parameters                                                         | Intra-particle diffusion model |       |       |             |       |       |             |       |       |
|--------------------------------------------------------------------|--------------------------------|-------|-------|-------------|-------|-------|-------------|-------|-------|
|                                                                    | JLUE-MOG-9                     |       |       | JLUE-MOG-10 |       |       | JLUE-MOG-11 |       |       |
| $C_0$<br>( $\text{mg}\cdot\text{L}^{-1}$ )                         | 20                             | 50    | 100   | 20          | 50    | 100   | 20          | 50    | 100   |
| $k_{i,1}$<br>( $\text{mg}\cdot\text{g}^{-1}\cdot\text{h}^{-1/2}$ ) | 51.94                          | 47.04 | 54.62 | 62.44       | 72.43 | 96.03 | 64.76       | 85.08 | 91.75 |
| $C_1$<br>( $\text{mg}\cdot\text{g}^{-1}$ )                         | 0.52                           | 4.84  | 9.48  | 0.95        | 4.00  | 7.48  | 1.10        | 2.29  | 7.63  |
| $R^2$                                                              | 0.97                           | 0.94  | 0.92  | 0.94        | 0.93  | 0.93  | 0.93        | 0.96  | 0.95  |
| $k_{i,2}$<br>( $\text{mg}\cdot\text{g}^{-1}\cdot\text{h}^{-1/2}$ ) | 13.64                          | 9.64  | 6.50  | 8.04        | 13.59 | 22.19 | 5.58        | 27.25 | 25.37 |
| $C_2$<br>( $\text{mg}\cdot\text{g}^{-1}$ )                         | 10.88                          | 29.95 | 51.55 | 15.13       | 32.23 | 49.55 | 16.35       | 24.23 | 49.44 |
| $R^2$                                                              | 0.99                           | 0.96  | 0.94  | 0.94        | 0.95  | 0.95  | 0.96        | 0.97  | 0.96  |
| $k_{i,3}$<br>( $\text{mg}\cdot\text{g}^{-1}\cdot\text{h}^{-1/2}$ ) | 2.45                           | 0.84  | 1.36  | 0.67        | 0.85  | 2.13  | 0.78        | 2.59  | 1.79  |
| $C_3$<br>( $\text{mg}\cdot\text{g}^{-1}$ )                         | 17.37                          | 44.72 | 81.02 | 18.79       | 46.95 | 85.79 | 18.66       | 44.98 | 91.62 |
| $R^2$                                                              | 0.95                           | 0.89  | 0.97  | 0.81        | 0.73  | 0.89  | 0.99        | 0.84  | 0.74  |

**Table S4.** Freundlich, Langmuir and Temkin adsorption isotherm model parameters for CTC adsorption by JLUE-MOG-9, JLUE-MOG-10 and JLUE-MOG-11 at 25 °C.

| JLUE-MOGs   | Freundlich isotherm |        |       | Langmuir isotherm                          |        |       | Temkin isotherm                            |                                           |        |
|-------------|---------------------|--------|-------|--------------------------------------------|--------|-------|--------------------------------------------|-------------------------------------------|--------|
|             | $n$                 | $K_F$  | $R^2$ | $q_m$<br>( $\text{mg}\cdot\text{g}^{-1}$ ) | $K_L$  | $R^2$ | $K_T$<br>( $\text{L}\cdot\text{mg}^{-1}$ ) | $B$<br>( $\text{J}\cdot\text{mol}^{-1}$ ) | $R^2$  |
|             | JLUE-MOG-9          | 2.54   | 39.81 | 0.98                                       | 912.47 | 3.23  | 0.91                                       | 0.089                                     | 131.84 |
| JLUE-MOG-10 | 2.97                | 132.59 | 0.97  | 1518.74                                    | 18.13  | 0.96  | 0.90                                       | 168.61                                    | 0.86   |
| JLUE-MOG-11 | 2.56                | 168.64 | 0.93  | 1520.82                                    | 74.13  | 0.99  | 1.11                                       | 237.43                                    | 0.98   |

**Table S5.** The water quality parameters of distilled water, tap water and river water.

|                        | <b>COD</b>                 | <b>TN</b>                  | <b>TP</b>                  | <b>NO<sub>3</sub><sup>-</sup>-N</b> | <b>NH<sub>4</sub><sup>+</sup>-N</b> | <b>SS</b>                  |
|------------------------|----------------------------|----------------------------|----------------------------|-------------------------------------|-------------------------------------|----------------------------|
|                        | <b>(mg·L<sup>-1</sup>)</b> | <b>(mg·L<sup>-1</sup>)</b> | <b>(mg·L<sup>-1</sup>)</b> | <b>(mg·L<sup>-1</sup>)</b>          | <b>(mg·L<sup>-1</sup>)</b>          | <b>(mg·L<sup>-1</sup>)</b> |
|                        | <sup>1)</sup>              |                            | <sup>1)</sup>              |                                     |                                     | <sup>1)</sup>              |
| <b>Distilled Water</b> | n.d.                       | 0.50                       | 0.04                       | n.d.                                | n.d.                                | n.d.                       |
| <b>Tap Water</b>       | n.d.                       | 6.45                       | 0.01                       | n.d.                                | 0.05                                | n.d.                       |
| <b>River Water</b>     | 24.00                      | 16.24                      | 0.13                       | 5.83                                | 0.10                                | 1.00                       |

<sup>a)</sup> n.d. means not detected

**Table S6.** Cost estimation for the production of typical JLUE-MOG-10 per unit weight.

| <b>Cost</b>      | <b>Materials</b>                                     | <b>Used amount/<br/>Duration</b> | <b>Unit Price<br/>(RMB)</b> | <b>Total Price<br/>(RMB)</b> |
|------------------|------------------------------------------------------|----------------------------------|-----------------------------|------------------------------|
| Raw<br>materials | Fe(NO <sub>3</sub> ) <sub>3</sub> ·9H <sub>2</sub> O | 0.1050 g                         | 0.02 per gram               | 0.0021                       |
|                  | Tb(NO <sub>3</sub> ) <sub>3</sub> ·6H <sub>2</sub> O | 0.1179 g                         | 0.010 per gram              | 0.0012                       |
|                  | TATB                                                 | 0.1576 g                         | 0.07 per gram               | 0.011                        |
|                  | Ethanol                                              | 1 mL                             | 5.0 per liter               | 0.005                        |
|                  | DMSO                                                 | 5 mL                             | 11.5 per liter              | 0.058                        |
| Net amount       |                                                      |                                  | 0.25 per gram               |                              |

**Table S7.** FCCD experimental design and related CTC removal efficiencies by JLUE-MOG-10.

| <b>Run</b> | <b>Initial pH</b> | <b>Initial CTC Concentration (mg·L<sup>-1</sup>)</b> | <b>JLUE-MOG Dosage (g·L<sup>-1</sup>)</b> | <b>CTC Removal Efficiency (%)</b> |
|------------|-------------------|------------------------------------------------------|-------------------------------------------|-----------------------------------|
| 1          | 2.0               | 125                                                  | 1.00                                      | 44.50                             |
| 2          | 10.0              | 50                                                   | 0.50                                      | 72.17                             |
| 3          | 2.0               | 50                                                   | 1.50                                      | 66.04                             |
| 4          | 6.0               | 125                                                  | 1.00                                      | 91.01                             |
| 5          | 6.0               | 125                                                  | 1.50                                      | 93.63                             |
| 6          | 10.0              | 200                                                  | 1.50                                      | 93.12                             |
| 7          | 6.0               | 50                                                   | 1.00                                      | 97.20                             |
| 8          | 6.0               | 125                                                  | 1.00                                      | 92.02                             |
| 9          | 10.0              | 125                                                  | 1.00                                      | 76.27                             |
| 10         | 6.0               | 125                                                  | 1.00                                      | 92.02                             |
| 11         | 10.0              | 50                                                   | 1.50                                      | 92.97                             |
| 12         | 6.0               | 200                                                  | 1.00                                      | 91.85                             |
| 13         | 6.0               | 125                                                  | 1.00                                      | 94.68                             |
| 14         | 2.0               | 50                                                   | 0.50                                      | 56.00                             |
| 15         | 6.0               | 125                                                  | 1.00                                      | 90.84                             |
| 16         | 2.0               | 200                                                  | 0.50                                      | 41.65                             |
| 17         | 6.0               | 125                                                  | 1.00                                      | 92.82                             |
| 18         | 2.0               | 200                                                  | 1.50                                      | 47.54                             |
| 19         | 10.0              | 200                                                  | 0.50                                      | 75.24                             |
| 20         | 6.0               | 125                                                  | 0.50                                      | 81.83                             |

**Table S8.** ANOVA for the optimized FCCD model.

| <b>Source</b>               | <b>Sum of Squares</b> | <b>df</b> | <b>Mean Square</b> | <b>F Value</b> | <b>P-value Prob &gt; F</b> |                 |
|-----------------------------|-----------------------|-----------|--------------------|----------------|----------------------------|-----------------|
| Model                       | 6456.55               | 9         | 717.39             | 126.85         | < 0.0001                   | significant     |
| A-Initial pH                | 2372.84               | 1         | 2372.84            | 419.58         | < 0.0001                   |                 |
| B-Initial CTC Concentration | 122.39                | 1         | 122.39             | 21.64          | 0.0009                     |                 |
| C-JLUE-MOG Dosage           | 440.82                | 1         | 440.82             | 77.95          | < 0.0001                   |                 |
| AB                          | 162.64                | 1         | 162.64             | 28.76          | 0.0003                     |                 |
| AC                          | 64.68                 | 1         | 64.68              | 11.44          | 0.0070                     |                 |
| BC                          | 6.27                  | 1         | 6.27               | 1.11           | 0.3172                     |                 |
| A <sup>2</sup>              | 2193.71               | 1         | 2193.71            | 387.91         | < 0.0001                   |                 |
| B <sup>2</sup>              | 95.70                 | 1         | 95.70              | 16.92          | 0.0021                     |                 |
| C <sup>2</sup>              | 2.20                  | 1         | 2.20               | 0.39           | 0.5464                     |                 |
| Residual                    | 56.55                 | 10        | 5.66               |                |                            |                 |
| Lack of Fit                 | 46.67                 | 5         | 9.33               | 4.72           | 0.0568                     | not significant |
| Pure Error                  | 9.88                  | 5         | 1.98               |                |                            |                 |
| Cor Total                   | 6513.11               | 19        |                    |                |                            |                 |
| Std. Dev.                   | 2.38                  |           | $R^2$              |                | 0.9913                     |                 |
| Mean                        | 79.17                 |           | $R_{Adj}^2$        |                | 0.9835                     |                 |
| C.V. %                      | 3.00                  |           | $R_{Pred}^2$       |                | 0.9656                     |                 |
| PRESS                       | 224.28                |           | Adeq Precision     |                | 35.06                      |                 |

**Table S9.** FCCD design validation at optimized conditions.

| <b>Number</b> | <b>pH</b> | <b>CTC<br/>Concentration<br/>(mg·L<sup>-1</sup>)</b> | <b>JLUE-MOG<br/>Dosage<br/>(g·L<sup>-1</sup>)</b> | <b>Removal<br/>efficiency<br/>(Predicted)<br/>(%)</b> | <b>Removal<br/>efficiency<br/>(Actual)<br/>(%)</b> |
|---------------|-----------|------------------------------------------------------|---------------------------------------------------|-------------------------------------------------------|----------------------------------------------------|
| 1             | 6.0       | 50                                                   | 1.00                                              | 100                                                   | 96.96                                              |
| 2             | 7.1       | 61                                                   | 1.02                                              | 100                                                   | 96.60                                              |
| 3             | 7.1       | 51                                                   | 0.89                                              | 99                                                    | 93.90                                              |

**Table S10.** Comparison of CTC detection limit by various sensors.

| Sensor                                         | Analyte | Detection limit | References       |
|------------------------------------------------|---------|-----------------|------------------|
| Metal–organic coordination<br>polymer(Zn(bix)) | CTC     | 19 nM           | 64               |
| CdTe QDs@ZIF-8 composite                       | CTC     | 37 nM           | 65               |
| TSA/BSA-Au/AgNCs probe                         | CTC     | 64 nM           | 66               |
| IL1-SMIP/MWCNT-IL/GCE                          | CTC     | 80 nM           | 67               |
| JLUE-MOG-7                                     | CTC     | 520 nM          | 33               |
| FHBA@ZIF-8@Eu-GMP                              | TC      | 60 nM           | 68               |
| [Cd(L)(chdc)·(H <sub>2</sub> O)]n              | TC      | 76 nM           | 69               |
| carbon dots                                    | TC      | 170 nM          | 70               |
| JLUE-MOG-9                                     | CTC     | 79 nM           | <b>This work</b> |



**Table S11.** The recoveries of CTC in distilled water by the measurements of JLUE-MOG-9 based on a smartphone.

| <b>Spiked Concentration</b><br><b>(mg·L<sup>-1</sup>)</b> | <b>Found</b><br><b>(mg·L<sup>-1</sup>)</b> | <b>Recovery</b><br><b>(%)</b> | <b>RSD</b><br><b>(%)</b> |
|-----------------------------------------------------------|--------------------------------------------|-------------------------------|--------------------------|
| 15                                                        | 14.12                                      | 94.11                         | 1.22                     |
| 25                                                        | 30.78                                      | 123.13                        | 2.44                     |
| 35                                                        | 35.78                                      | 102.24                        | 1.23                     |

**Table S12.** The recoveries of CTC in distilled water, tap water and river water by the measurements of JLUE-MOG-9@paper based on a smartphone.

| <b>Spiked<br/>concentration<br/>(mg·L<sup>-1</sup>)</b> | <b>Distilled Water</b>               |                         |                    | <b>Tap Water</b>                     |                         |                    | <b>River Water</b>                   |                         |                    |
|---------------------------------------------------------|--------------------------------------|-------------------------|--------------------|--------------------------------------|-------------------------|--------------------|--------------------------------------|-------------------------|--------------------|
|                                                         | <b>Found<br/>(mg·L<sup>-1</sup>)</b> | <b>Recovery<br/>(%)</b> | <b>RSD<br/>(%)</b> | <b>Found<br/>(mg·L<sup>-1</sup>)</b> | <b>Recovery<br/>(%)</b> | <b>RSD<br/>(%)</b> | <b>Found<br/>(mg·L<sup>-1</sup>)</b> | <b>Recovery<br/>(%)</b> | <b>RSD<br/>(%)</b> |
| 15                                                      | 16.13                                | 107.52                  | 5.88               | 15.49                                | 103.26                  | 3.72               | 13.67                                | 91.11                   | 4.89               |
| 25                                                      | 27.43                                | 109.71                  | 8.42               | 27.16                                | 108.65                  | 10.22              | 26.96                                | 107.85                  | 10.94              |
| 35                                                      | 38.24                                | 109.26                  | 6.39               | 35.84                                | 102.39                  | 4.49               | 36.27                                | 103.62                  | 7.51               |
